# Supplementary material for: Signature of gene aberrant alternative splicing events in pancreatic adenocarcinoma prognosis
Source: PubMed Central journal article supplement (PMC8100795; doi:10.7150/jca.48661), 2021-03-31
Supplement: jcav12p3164s1.pdf [file jcav12p3164s1.pdf]

**Supplementary Figure S1.** The prognostic models with single prognosis-relevant splicing events

(A) Alternate Donor site; (B) Alternate Promoter, (C) Alternate Terminator, (D) Exon Skip, (E) Retained Intron, (F) Kaplan-Meier curves drawn from the prognostic model after integration of each type.

**Supplementary Figure S2.** Survival analysis based on ESRP1 signature was further performed in the subgroup of patients with different clinical variables in the TCGA cohort.

(A) Age, (B) Gender, (C) Pathologic stage, (D) AJCC stage, and (E) Tumor size.

**Supplementary Figure S3.** Survival analysis based on RBM5 signature was further performed in the subgroup of patients with different clinical variables in the TCGA cohort.

(A) Age, (B) Gender, (C) Pathologic stage, (D) AJCC stage, and (E) Tumor size.

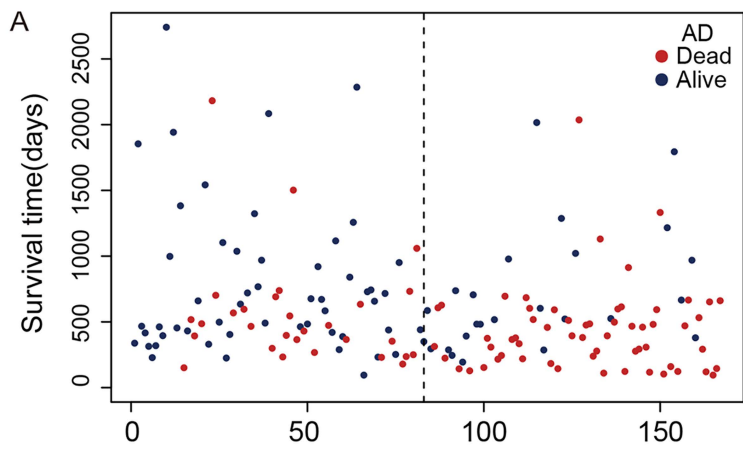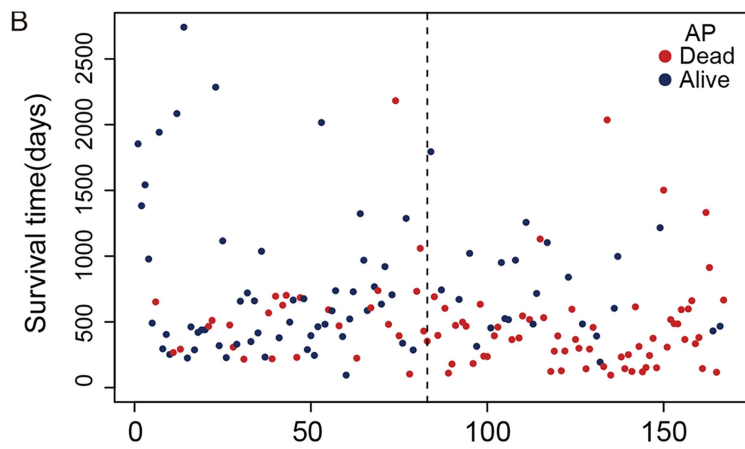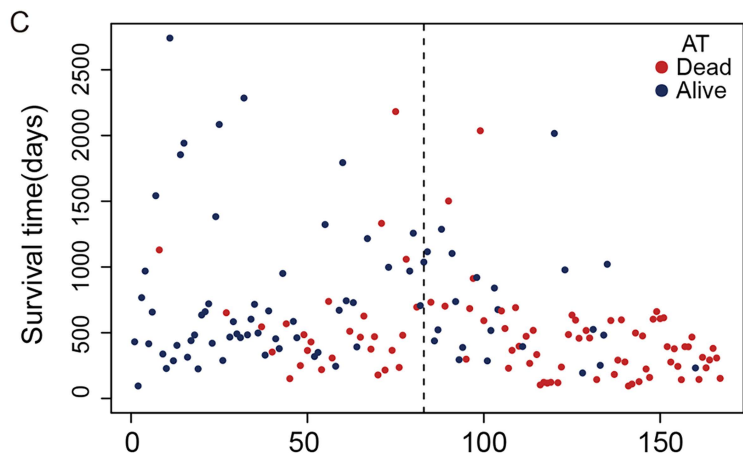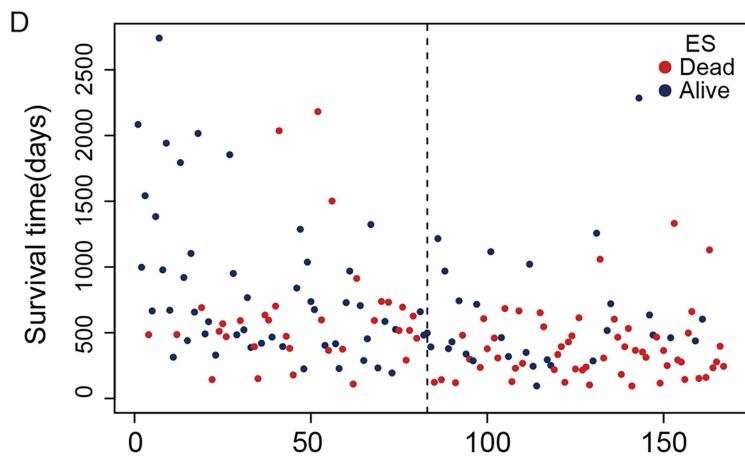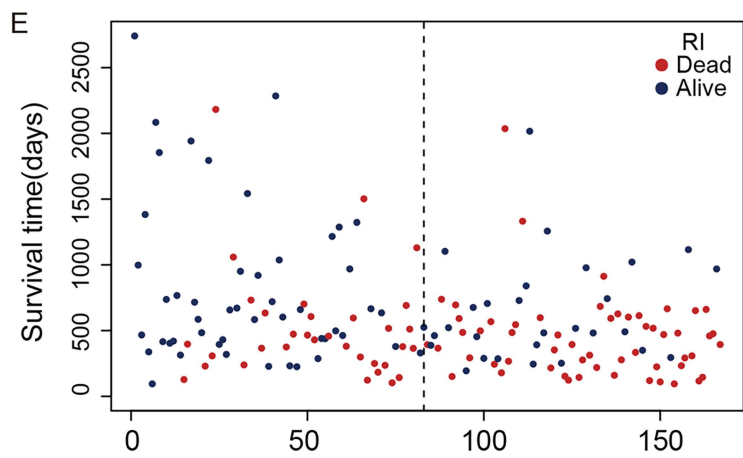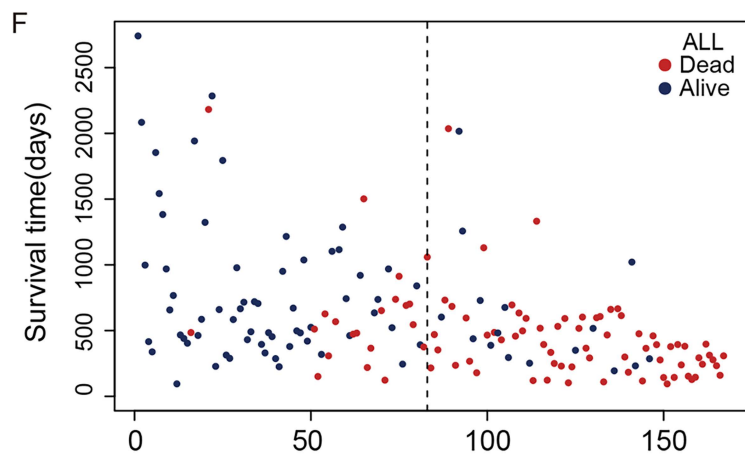

TCGA year&lt;=60

A

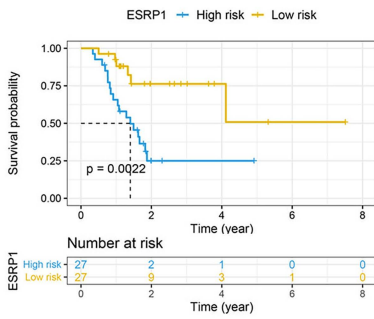

TCGA year&gt;60

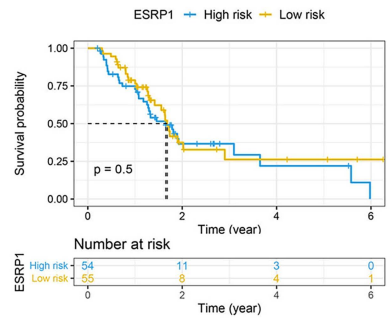

B

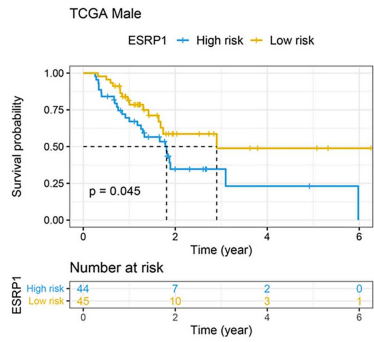

TCGA Female

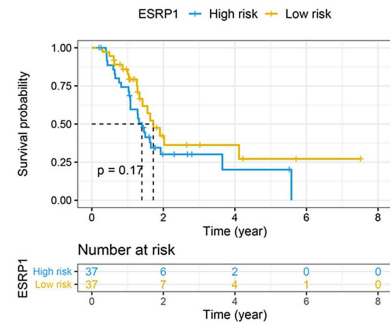

C

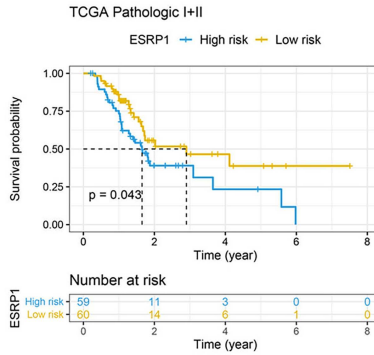

TCGA Pathologic III+IV

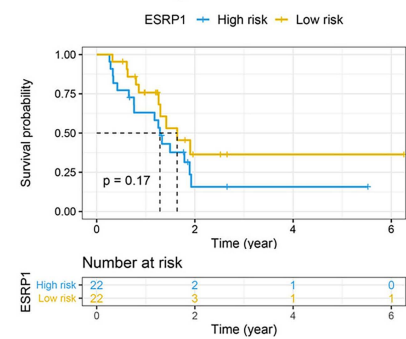

D

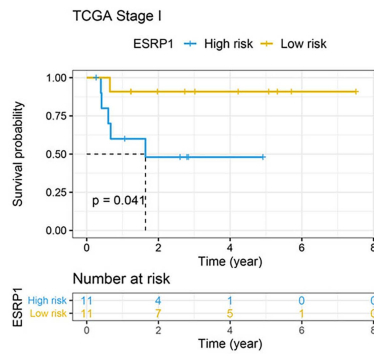

TCGA Stage II+III+IV

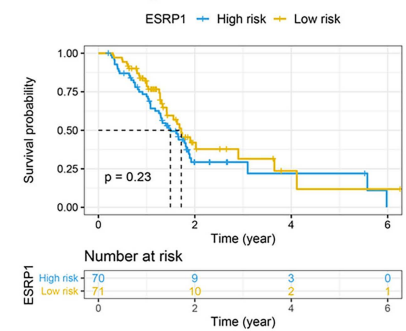

E

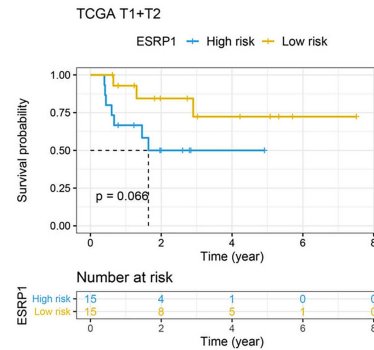

TCGA T3+T4

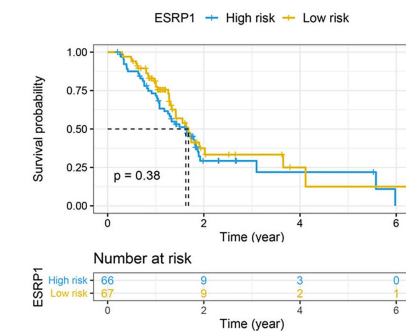

**A**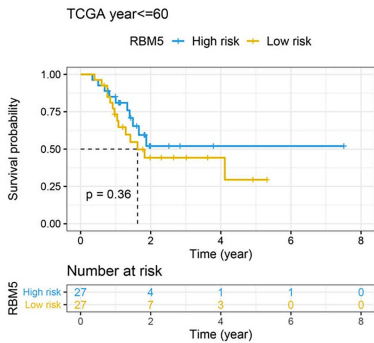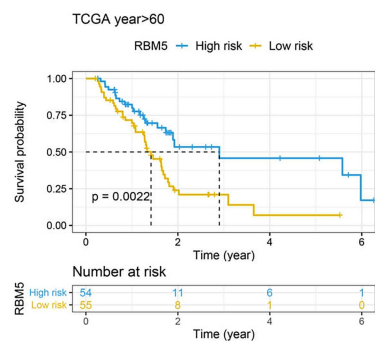**B**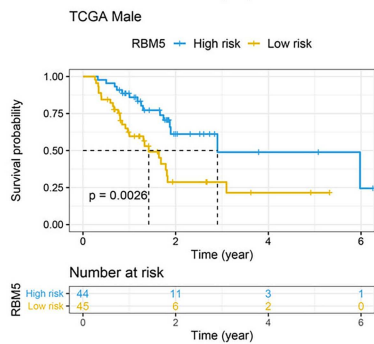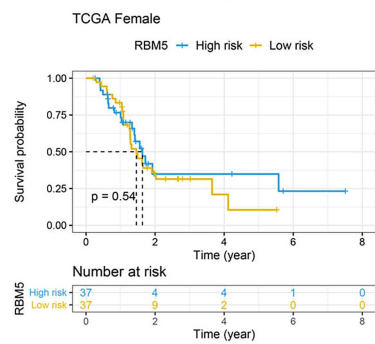**C**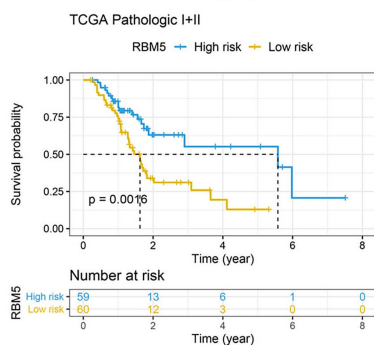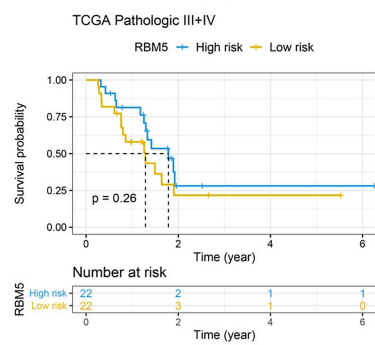**D**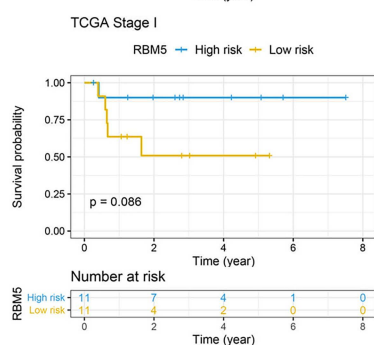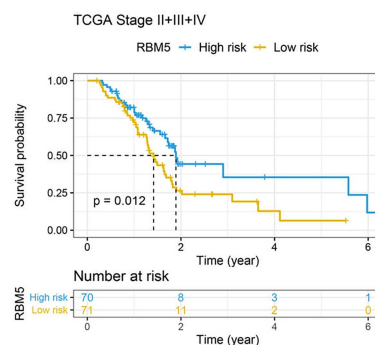**E**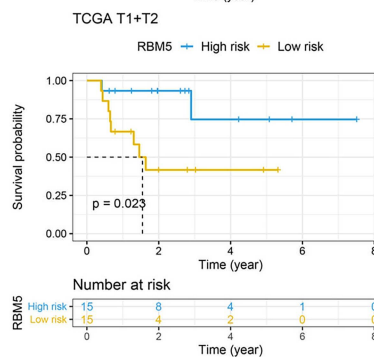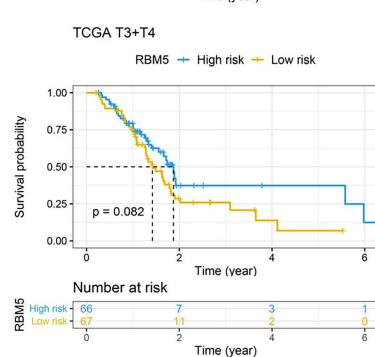

| Clinical/Pathological Features | Case |
|--------------------------------|------|
| <b>Gender</b>                  |      |
| male                           | 93   |
| female                         | 78   |
| <b>Age at diagnostic</b>       |      |
| ≥65                            | 93   |
| <65                            | 78   |
| <b>Pathology T</b>             |      |
| T1                             | 7    |
| T2                             | 23   |
| T3                             | 137  |
| T4                             | 4    |
| <b>Pathology N</b>             |      |
| N0                             | 48   |
| N1                             | 236  |
| uncertain                      | 1    |
| <b>Pathology TNM</b>           |      |
| IA                             | 6    |
| IB                             | 12   |
| IIA                            | 30   |
| IIB                            | 111  |
| III                            | 4    |
| IV                             | 5    |
| uncertain                      | 3    |
| <b>Tumor grade</b>             |      |
| G1                             | 28   |
| G2                             | 93   |
| G3                             | 45   |
| G4                             | 2    |
| uncertain                      | 3    |

Supplementary Table S1: Clinical characteristics of the patients with pancreatic cancer.

| Gene symbol | SF         | P-value  |
|-------------|------------|----------|
| ESRP1       | ESRP1      | 0.001764 |
| RBM5        | RBM5       | 0.003117 |
| TRA2A       | HTra2alpha | 0.004274 |
| HNRNPL      | hnRNP L    | 0.00451  |
| HNRNPA0     | hnRNP A0   | 0.00521  |
| SF1         | SF1        | 0.005565 |
| HNRNPM      | hnRNP M    | 0.007592 |
| ELAVL2      | HuB        | 0.021128 |
| RBMX        | hnRNP G    | 0.021606 |
| RBM4        | RBM4       | 0.024785 |
| HNRNPU      | hnRNP U    | 0.029977 |
| SFPQ        | PSF        | 0.036101 |
| YBX1        | YB-1       | 0.037203 |
| NOVA1       | Nova-1     | 0.041152 |
| ELAVL4      | HuD        | 0.043368 |

Supplementary Table S2: 15 splicing factors were significantly associated with overall survival of pancreatic cancer ( $p < 0.05$ ).
